# Supplementary material for: Fra2 Overexpression in Mice Leads to Non-allergic Asthma Development in an IL-13 Dependent Manner
Source: PubMed Central journal article supplement (PMC6133984; doi:10.3389/fimmu.2018.02018), 2018-09-05
Supplement: Data_Sheet_1.pdf [file Data_Sheet_1.pdf]

## *Supplementary Material*

### **Fra2 Overexpression in Mice Leads to Non-allergic Asthma Development in an IL-13 Dependent Manner**

**Anna Gungl<sup>1</sup>, Valentina Biasin<sup>2</sup>, Jochen Wilhelm<sup>3,4</sup>, Andrea Olschewski<sup>1,2</sup>, Grazyna Kwapiszewska<sup>1,2</sup>, Leigh M. Marsh<sup>2\*</sup>**

<sup>1</sup>Otto Loewi Research Center, Medical University of Graz, Graz, Austria

<sup>2</sup>Ludwig Boltzmann Institute for Lung Vascular Research, Graz, Austria

<sup>3</sup>Department of Internal Medicine, Universities of Giessen and Marburg Lung Center, Giessen, Germany

<sup>4</sup>German Center for Lung Research, Justus-Liebig University, Giessen, Germany

#### **\*Correspondence:**

Leigh M. Marsh

Ludwig Boltzmann Institute for Lung Vascular Research

Stiftingtalstrasse 24, 8010 Graz, Austria

E-mail: [Leigh.Marsh@lvr.lbg.ac.at](mailto:Leigh.Marsh@lvr.lbg.ac.at)

## **Figure legends**

### **Figure E1: Peribronchial inflammation in Fra2 TG mice.**

Hematoxylin and eosin (HE) staining of airways in WT and Fra2 TG mice.

### **Figure E2:**

Uncropped images of the Western blot membranes shown in Figure 4A. St: Standard; WT: wild-type; TG: Fra2 transgene.

### **Figure E3:**

Uncropped images of the Western blot membranes shown in Figure 5B. St: Standard; WT: wild-type; TG: Fra2 transgene, IgG: isotype control; aIL-13: anti-IL-13 neutralising antibody.

### **Figure E4:**

Uncropped images of the Western blot membranes shown in Figure 9E. St: Standard; WT: wild-type; TG: Fra2 transgene; Bude: Budesonide.

### **Figure E5:**

Uncropped images of Western blot membranes shown in Figure 10A. St: Standard; WT: wild-type; TG: Fra2 transgene, IgG: isotype control; aIL-13: anti-IL-13 neutralising antibody.

### **Figure E6:**

Uncropped images of the Western blot membranes shown in Figure 10B. St: Standard; WT: wild-type; TG: Fra2 transgene; Bude: Budesonide.

Figure E1

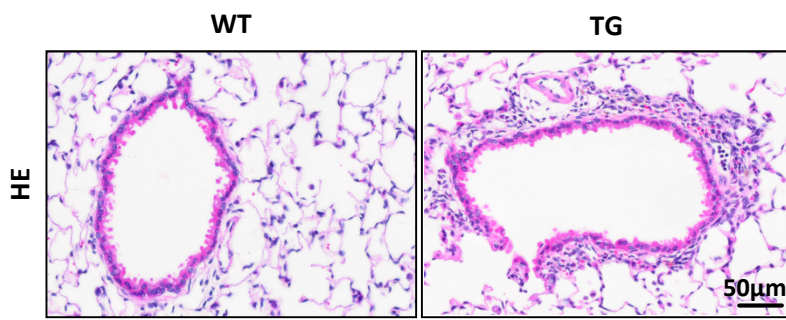

Figure E2

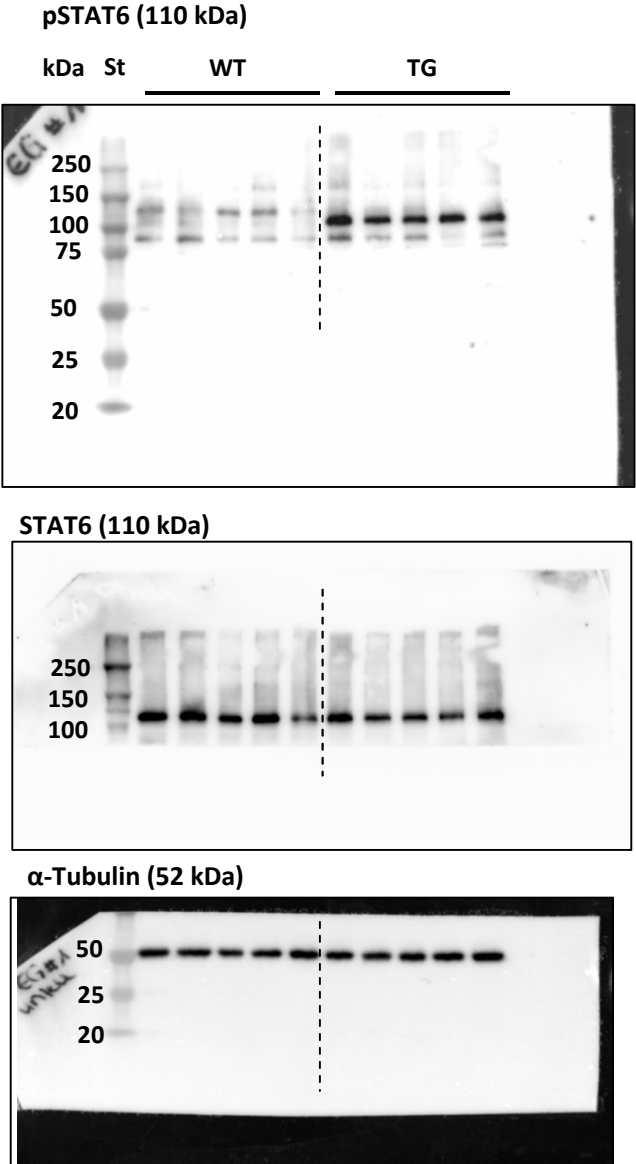

(Figure 4A)

Figure E3

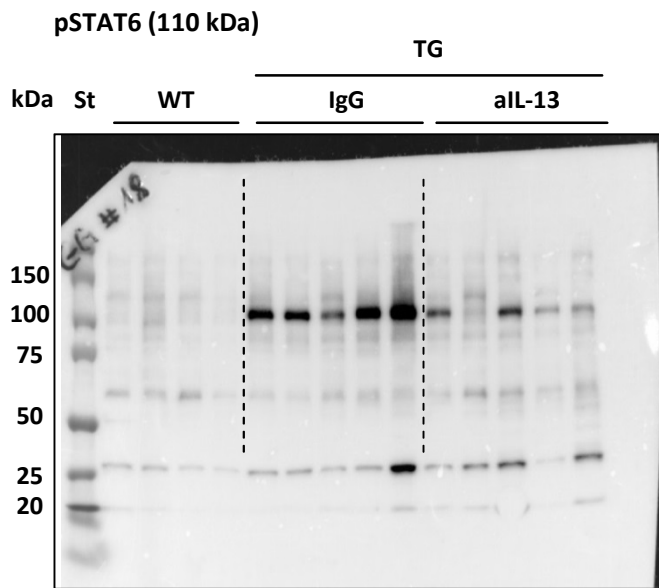

STAT6 (110 kDa)

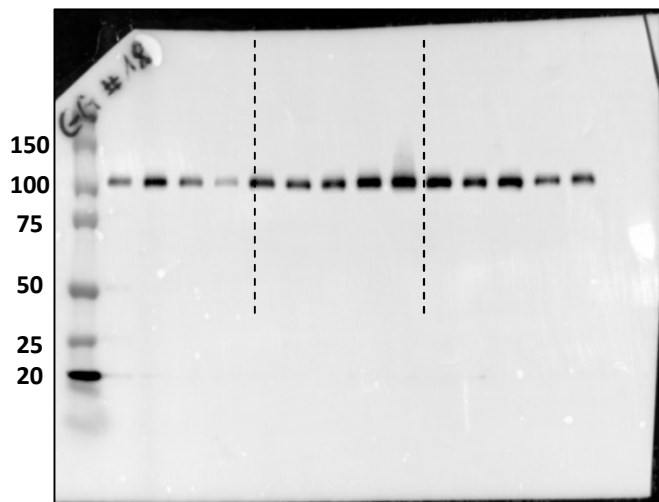

$\alpha$ -Tubulin (52 kDa)

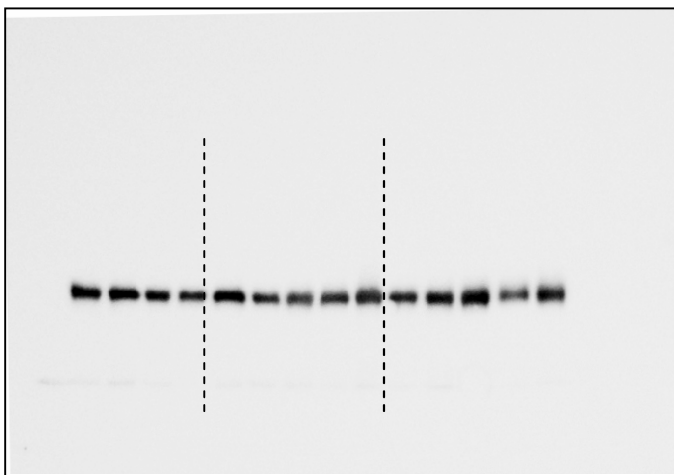

(Figure 5B)

Figure E4

pSTAT6 (110 kDa)

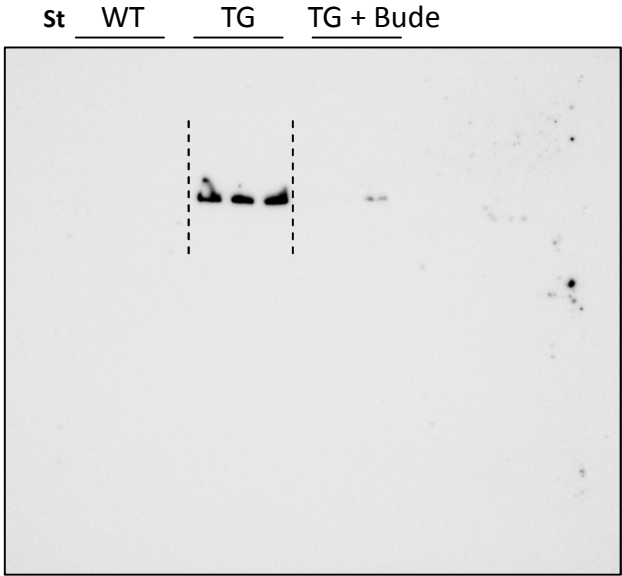

$\alpha$ -Tubulin (52 kDa)

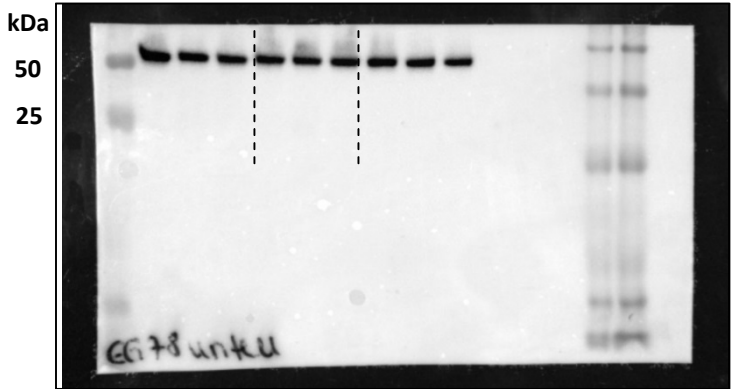

(Figure 9E)

Figure E5

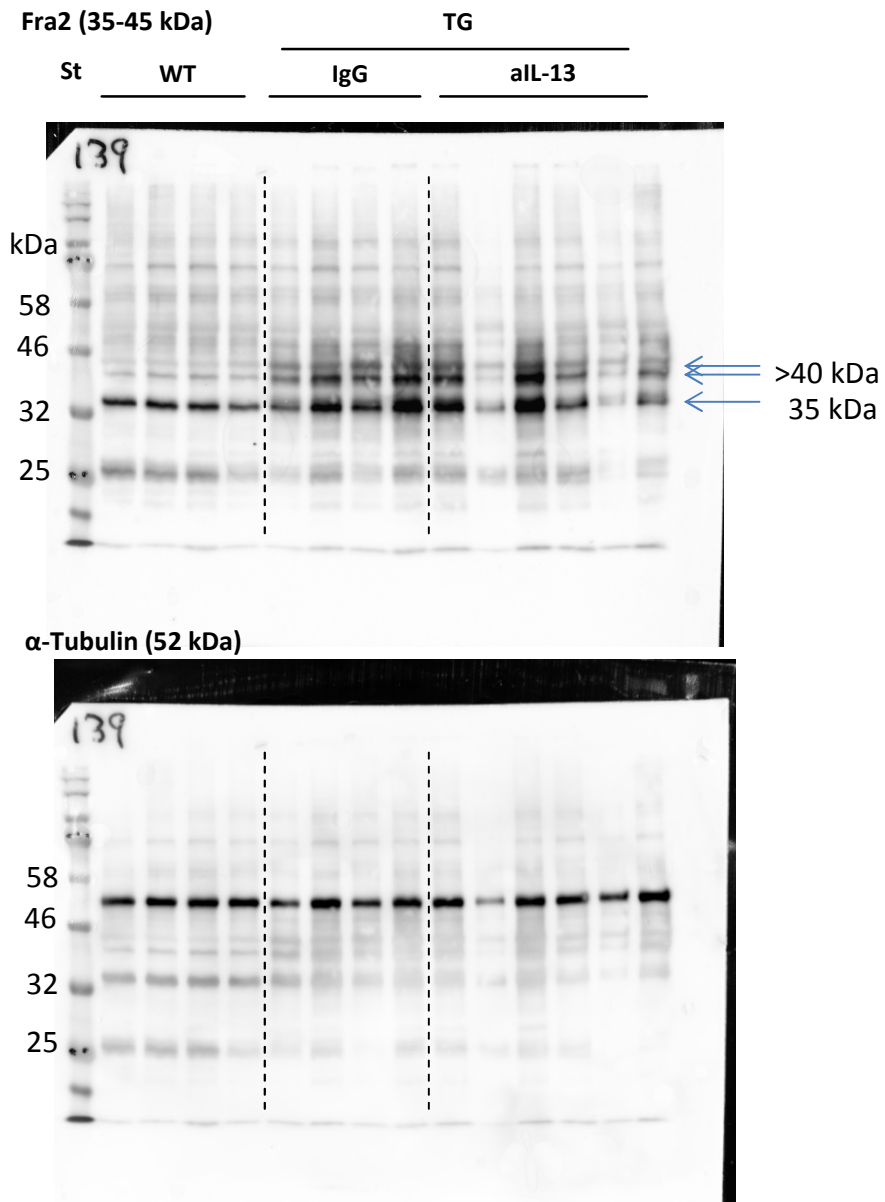

(Figure 10A)

Figure E6

Fra2 (35-45 kDa)

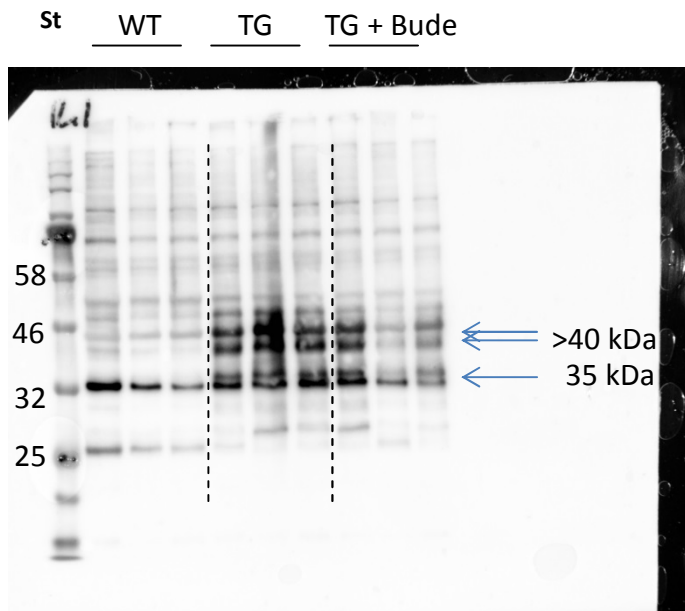

$\alpha$ -Tubulin (52 kDa)

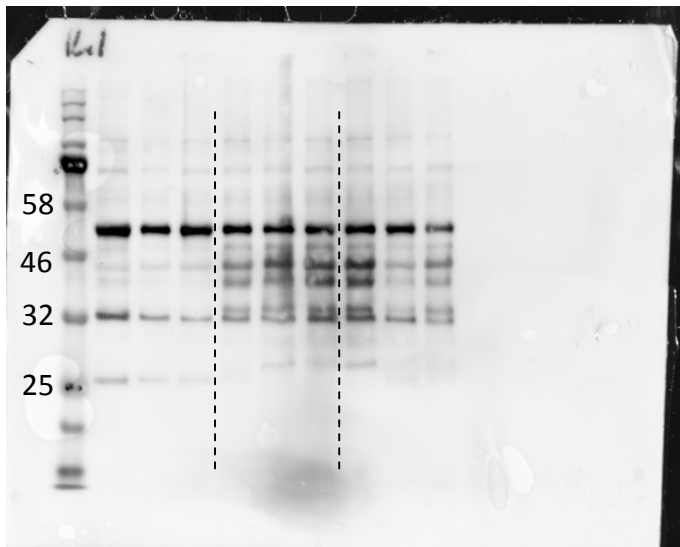

(Figure 10B)
